# Supplementary material for: Solution-processable Ti3C2Tx nanosheets as an efficient hole transport layer for high-performance and stable polymer solar cells
Source: Royal Society of Chemistry journal article supplement (doi:10.1039/c9tc03415c), 2019-01-01
Supplement: c9tc03415c1.pdf [file c9tc03415c1.pdf]

## Supporting information

### **Solution-processable $\text{Ti}_3\text{C}_2\text{T}_x$ nanosheets as an efficient hole transport layer for high-performance and stable polymer solar cells**

Chunli Hou<sup>a</sup>, Huangzhong Yu<sup>a,b,c\*</sup>, Chengwen Huang<sup>a</sup>

<sup>a</sup>School of Physics and Optoelectronics, South China University of Technology, 510640

Guangzhou, China

<sup>b</sup>South China Institute of Collaborative Innovation, 523808 Dongguan, China

<sup>c</sup>Guangdong Provincial Key Laboratory of New and Renewable Energy Research and

Development, 510640 Guangzhou, China

Corresponding author: [hzyu@scut.edu.cn](mailto:hzyu@scut.edu.cn) (H.Z. Yu)

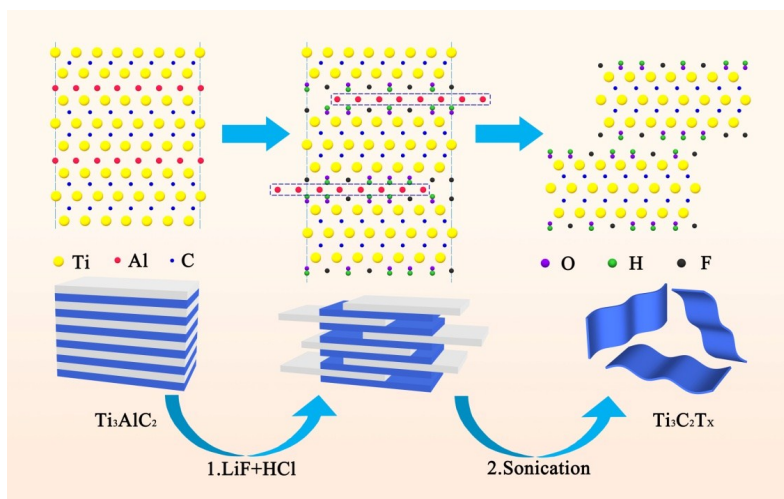

**Scheme S1** Schematic illustration for the synthesis of  $\text{Ti}_3\text{C}_2\text{T}_x$ .

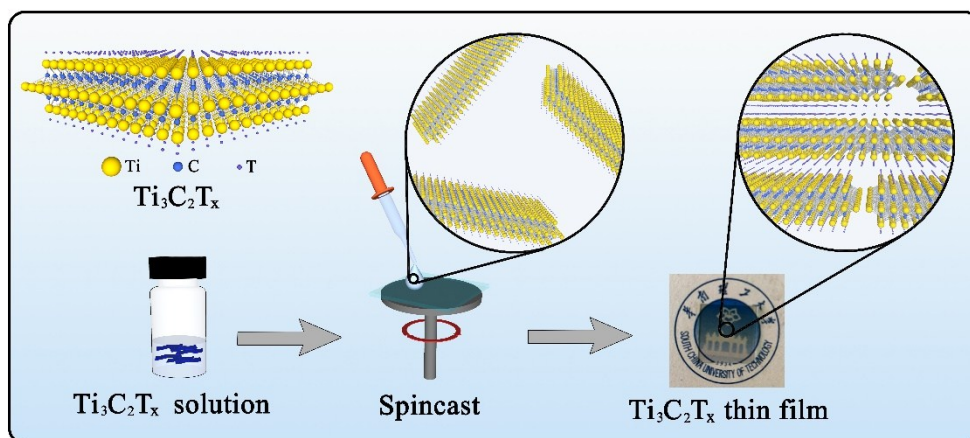

**Scheme S2** Schematic illustration for the preparation of  $\text{Ti}_3\text{C}_2\text{T}_x$  spin-casting film.

**Table S1** Photovoltaic parameters of PSCs with different PEDOT:PSS thicknesses. All parameters are averaged from 10 devices.

| PEDOT:PSS thickness (nm) | $V_{oc}$ (V) | $J_{sc}$ (mA cm <sup>-2</sup> ) | FF (%) | PCE (%)      |
|--------------------------|--------------|---------------------------------|--------|--------------|
| 46                       | 0.90         | 16.15                           | 68.37  | 9.94 ± 0.11  |
| 41                       | 0.90         | 16.12                           | 68.82  | 9.98 ± 0.11  |
| 37                       | 0.90         | 16.13                           | 69.57  | 10.10 ± 0.11 |
| 34                       | 0.90         | 16.10                           | 68.24  | 9.89 ± 0.11  |
| 29                       | 0.90         | 16.06                           | 67.93  | 9.82 ± 0.11  |
| 25                       | 0.89         | 15.98                           | 67.34  | 9.82 ± 0.11  |

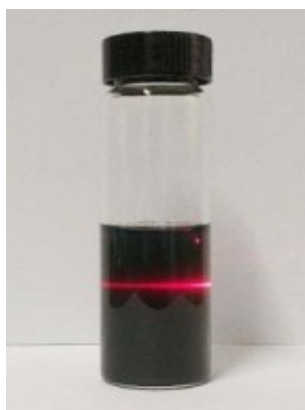

**Fig. S1** The Tyndall scattering effect in  $\text{Ti}_3\text{C}_2\text{T}_x$  solution.

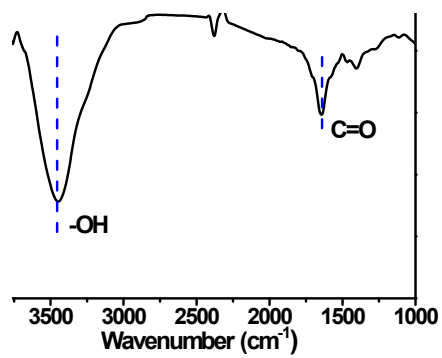

Fig. S2 FTIR spectrum of  $\text{Ti}_3\text{C}_2\text{T}_x$ .

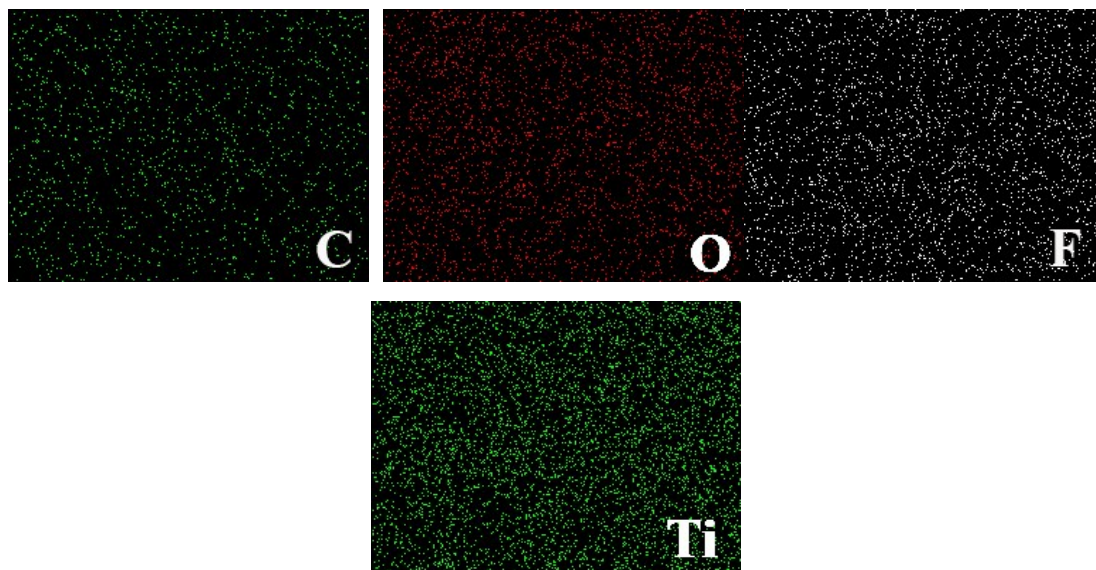

**Fig. S3** Elemental maps of  $\text{Ti}_3\text{C}_2\text{T}_x$ .

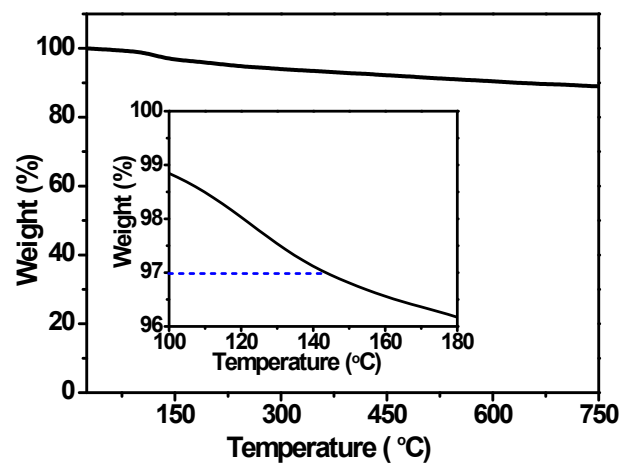

Fig. S4 TGA curve of  $\text{Ti}_3\text{C}_2\text{T}_x$ .

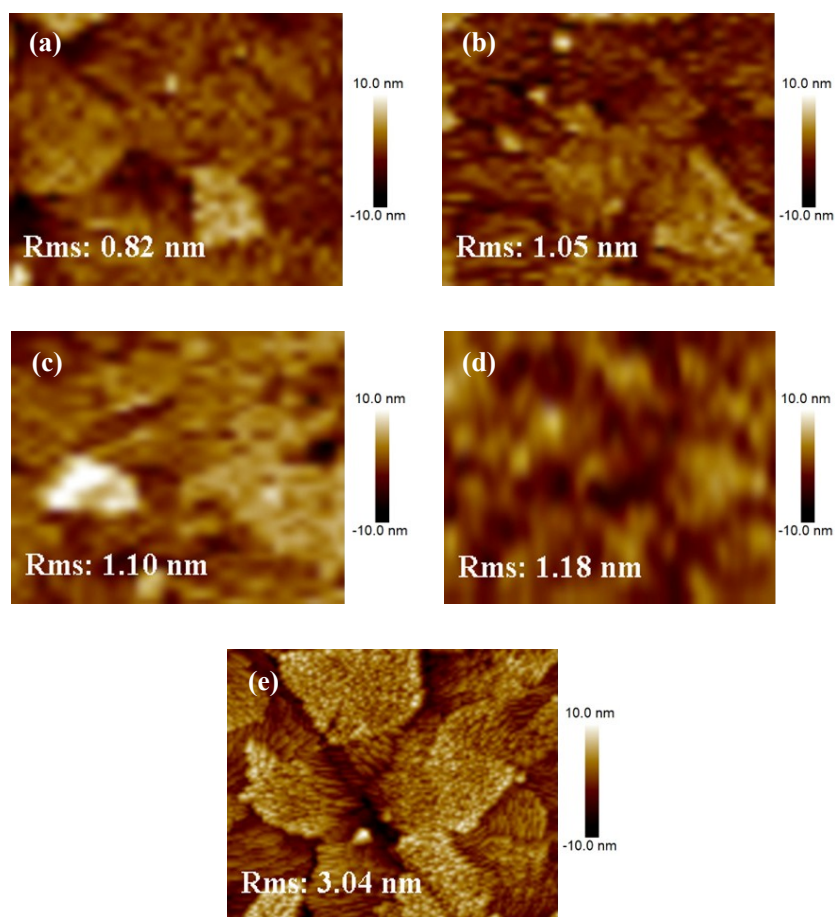

**Fig. S5** AFM images of (a)  $\text{Ti}_3\text{C}_2\text{T}_x$  (1.5 nm), (b)  $\text{Ti}_3\text{C}_2\text{T}_x$  (3 nm), (c)  $\text{Ti}_3\text{C}_2\text{T}_x$  (6 nm), (d)  $\text{Ti}_3\text{C}_2\text{T}_x$  (15 nm), and (e) ITO only. All the images are  $1\ \mu\text{m} \times 1\ \mu\text{m}$ .



**Table S2** The conductivities of the PEDOT:PSS and  $\text{Ti}_3\text{C}_2\text{T}_x$  films on bare glass.

| Device Configuration                     | Conductivity ( $\text{S cm}^{-1}$ ) |
|------------------------------------------|-------------------------------------|
| Glass/PEDOT:PSS                          | 0.0068                              |
| Glass/ $\text{Ti}_3\text{C}_2\text{T}_x$ | 4035.61                             |

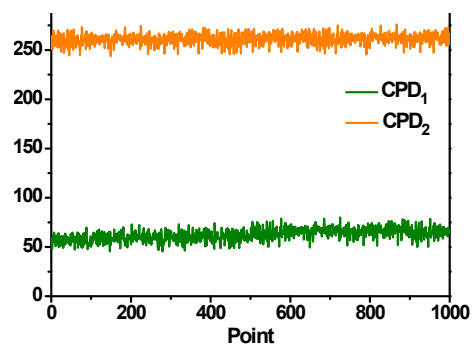

**Fig. S6** CPD image of Au (CPD<sub>1</sub>) sample and Ti<sub>3</sub>C<sub>2</sub>T<sub>x</sub> (CPD<sub>2</sub>) related to the Au reference probe.

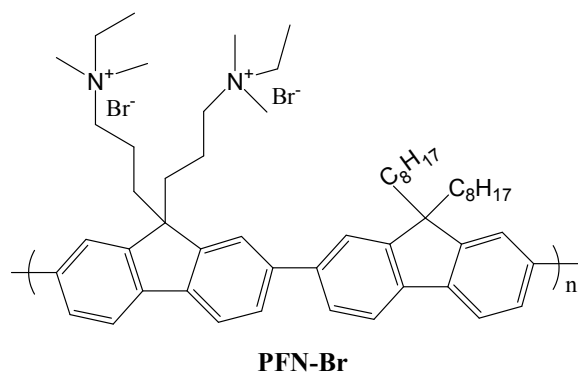

**Fig. S7** Chemical structure of PFN-Br.

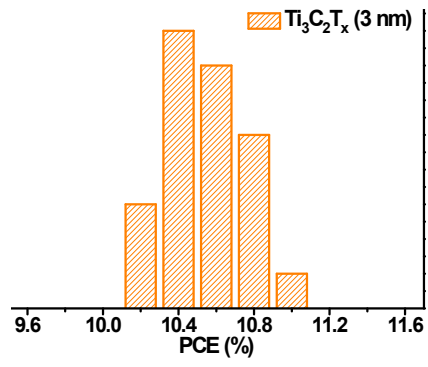

**Fig. S8** Histogram of PCE counts for 24 devices based on  $\text{Ti}_3\text{C}_2\text{T}_x$  (3 nm).
